# Supplementary material for: Left frontal hub connectivity delays cognitive impairment in autosomal-dominant and sporadic Alzheimer’s disease
Source: PubMed Central journal article supplement (PMC5888938; doi:10.1093/brain/awy008), 2018-02-15
Supplement: brain-2017-01352-file006_awy008.pdf [file brain-2017-01352-file006_awy008.pdf]

**Supplementary table 1:**

| <b>DIAN</b>                           | <b>Whole sample<br/>(n=313)</b> | <b>Non-selected<br/>sample<br/>(n=184)</b> | <b>Selected sample<br/>(n=129)</b> | <b>Selected vs. non-<br/>selected<br/>p-value</b> |
|---------------------------------------|---------------------------------|--------------------------------------------|------------------------------------|---------------------------------------------------|
| Age                                   | 38.73 (10.46)                   | 39.5 (10.64)                               | 37.64 (10.13)                      | 0.119                                             |
| Gender (m/f)                          | 190/123                         | 70/114                                     | 53/76                              | 0.588                                             |
| Years of education                    | 14.32 (3.07)                    | 13.91 (3.16)                               | 14.91 (2.84)                       | 0.064                                             |
| Estimated years<br>from symptom onset | -8.80 (11.09)                   | -7.87 (10.85)                              | -9.73 (11.29)                      | 0.176                                             |

**Supplementary table 2:**

| <b>DELCODE</b>     | <b>Whole sample<br/>(n=366)</b> | <b>Non-selected<br/>sample<br/>(n=250)</b> | <b>Selected Sample<br/>(n=116)</b> | <b>Selected vs. non-<br/>selected<br/>p-value</b> |
|--------------------|---------------------------------|--------------------------------------------|------------------------------------|---------------------------------------------------|
| Age                | 70.44 (5.91)                    | 70.52 (6.06)                               | 70.27 (5.59)                       | 0.696                                             |
| Gender (m/f)       | 175/191                         | 123/127                                    | 52/64                              | 0.436                                             |
| Years of education | 14.45 (3.04)                    | 14.34 (2.98)                               | 14.71 (3.15)                       | 0.288                                             |

**Supplementary table 3: Summary of linear mixed effects models for global RFC-connectivity**

| <b>ADAD-MC</b>                          | <b><math>\beta</math> (SE)</b> | <b>T-value</b> | <b>p-value</b>      | <b>Overall R<sup>2</sup></b> |
|-----------------------------------------|--------------------------------|----------------|---------------------|------------------------------|
| <b>MMSE<sup>a</sup></b>                 |                                |                |                     |                              |
| <i>EYO x gRFC-connectivity</i>          | 0.169 (0.070)                  | 2.425          | 0.0181              | 0.475                        |
| <i>EYO</i>                              | -0.349 (0.071)                 | -4.954         | <0.001 <sup>c</sup> |                              |
| <i>gRFC-connectivity</i>                | 0.103 (0.063)                  | 1.644          | 0.105               |                              |
| <b>LM delayed recall<sup>a</sup></b>    |                                |                |                     |                              |
| <i>EYO x gRFC-connectivity</i>          | 0.189 (0.112)                  | 1.695          | 0.095               | 0.457                        |
| <i>EYO</i>                              | -0.409 (0.111)                 | -3.676         | <0.001 <sup>c</sup> |                              |
| <i>gRFC-connectivity</i>                | 0.111 (0.097)                  | 1.139          | 0.259               |                              |
| <b>Sporadic AD-A<math>\beta</math>+</b> | <b><math>\beta</math> (SE)</b> | <b>T-value</b> | <b>p-value</b>      | <b>Overall R<sup>2</sup></b> |
| <b>MMSE<sup>b</sup></b>                 |                                |                |                     |                              |
| <i>CSF-Tau x gRFC-connectivity</i>      | -0.080 (0.109)                 | -0.733         | 0.466               | 0.247                        |
| <i>CSF-Tau</i>                          | -0.471 (0.105)                 | -4.501         | <0.001 <sup>c</sup> |                              |
| <i>gRFC-connectivity</i>                | -0.027 (0.113)                 | -0.242         | 0.810               |                              |
| <b>LM delayed recall<sup>b</sup></b>    |                                |                |                     |                              |
| <i>CSF-Tau x gRFC-connectivity</i>      | 0.215 (0.121)                  | 1.787          | 0.078               | 0.256                        |
| <i>CSF-Tau</i>                          | -0.259 (0.113)                 | -2.296         | 0.025               |                              |
| <i>gRFC-connectivity</i>                | 0.217 (0.121)                  | 1.788          | 0.078               |                              |

*a*=model controlled for gender, family ID (fixed effects) & site (random effect); *b*= model controlled for age, gender (fixed effects) & site (random effect); *c*= $p < 0.05$ , bonferroni corrected

**Supplementary table 4: Summary of linear mixed effects models for global occipital pole-connectivity**

| <b>ADAD-MC</b>                          | <b><math>\beta</math> (SE)</b> | <b>T-value</b> | <b>p-value</b>      | <b>Overall R<sup>2</sup></b> |
|-----------------------------------------|--------------------------------|----------------|---------------------|------------------------------|
| <b>MMSE<sup>a</sup></b>                 |                                |                |                     |                              |
| <i>EYO x gOP-connectivity</i>           | 0.061 (0.116)                  | 0.523          | 0.602               | 0.436                        |
| <i>EYO</i>                              | -0.655 (0.107)                 | -6.150         | <0.001 <sup>c</sup> |                              |
| <i>gOP-connectivity</i>                 | 0.138 (0.095)                  | 1.449          | 0.152               |                              |
| <b>LM delayed recall<sup>a</sup></b>    |                                |                |                     |                              |
| <i>EYO x gOP-connectivity</i>           | 0.030 (0.115)                  | 0.264          | 0.792               | 0.446                        |
| <i>EYO</i>                              | -0.472 (0.115)                 | -4.104         | <0.001 <sup>c</sup> |                              |
| <i>gOP-connectivity</i>                 | 0.026 (0.099)                  | 0.261          | 0.795               |                              |
| <b>Sporadic AD-A<math>\beta</math>+</b> | <b><math>\beta</math> (SE)</b> | <b>T-value</b> | <b>p-value</b>      | <b>Overall R<sup>2</sup></b> |
| <b>MMSE<sup>b</sup></b>                 |                                |                |                     |                              |
| <i>CSF-Tau x gOP-connectivity</i>       | -0.109 (0.115)                 | -0.951         | 0.345               | 0.249                        |
| <i>CSF-Tau</i>                          | -0.276 (0.117)                 | -2.367         | 0.021               |                              |
| <i>gOP-connectivity</i>                 | 0.188 (0.116)                  | 1.624          | 0.109               |                              |
| <b>LM delayed recall<sup>b</sup></b>    |                                |                |                     |                              |
| <i>CSF-Tau x gOP-connectivity</i>       | -0.043 (0.108)                 | -0.399         | 0.691               | 0.240                        |
| <i>CSF-Tau</i>                          | -0.247 (0.117)                 | -2.120         | 0.038               |                              |
| <i>gOP-connectivity</i>                 | 0.203 (0.117)                  | 1.240          | 0.234               |                              |

*OP=occipital pole; a=model controlled for gender, family ID (fixed effects) & site (random effect); b= model controlled for age, gender (fixed effects) & site (random effect); c=p<0.05, bonferroni corrected*

**Supplementary table 5: Summary of linear mixed effects models for global M1-connectivity**

| <b>ADAD-MC</b>                          | <b><math>\beta</math> (SE)</b> | <b>T-value</b> | <b>p-value</b>      | <b>Overall R<sup>2</sup></b> |
|-----------------------------------------|--------------------------------|----------------|---------------------|------------------------------|
| <b>MMSE<sup>a</sup></b>                 |                                |                |                     |                              |
| <i>EYO x gM1-connectivity</i>           | 0.078 (0.099)                  | 0.791          | 0.432               | 0.473                        |
| <i>EYO</i>                              | -0.514 (0.110)                 | -4.664         | <0.001 <sup>c</sup> |                              |
| <i>gM1-connectivity</i>                 | 0.056 (0.101)                  | 0.551          | 0.583               |                              |
| <b>LM delayed recall<sup>a</sup></b>    |                                |                |                     |                              |
| <i>EYO x g M1-connectivity</i>          | 0.069 (0.102)                  | 0.683          | 0.497               | 0.444                        |
| <i>EYO</i>                              | -0.463 (0.113)                 | -4.091         | <0.001 <sup>c</sup> |                              |
| <i>gM1-connectivity</i>                 | -0.010 (0.104)                 | -0.094         | 0.925               |                              |
| <b>Sporadic AD-A<math>\beta</math>+</b> | <b><math>\beta</math> (SE)</b> | <b>T-value</b> | <b>p-value</b>      | <b>Overall R<sup>2</sup></b> |
| <b>MMSE<sup>b</sup></b>                 |                                |                |                     |                              |
| <i>CSF-Tau x gM1-connectivity</i>       | -0.044 (0.112)                 | -0.395         | 0.693               | 0.213                        |
| <i>CSF-Tau</i>                          | -0.292 (0.119)                 | -2.465         | 0.016               |                              |
| <i>gM1-connectivity</i>                 | 0.118 (0.122)                  | 0.967          | 0.337               |                              |
| <b>LM delayed recall<sup>b</sup></b>    |                                |                |                     |                              |
| <i>CSF-Tau x gM1-connectivity</i>       | -0.031 (0.118)                 | -0.265         | 0.792               | 0.215                        |
| <i>CSF-Tau</i>                          | -0.283 (0.114)                 | -2.478         | 0.016               |                              |
| <i>gM1-connectivity</i>                 | 0.116 (0.122)                  | 0.946          | 0.348               |                              |

*a*=model controlled for gender, family ID (fixed effects) & site (random effect); *b*= model controlled for age, gender (fixed effects) & site (random effect); *c*=*p*<0.05, bonferroni corrected
