# Supplementary material for: Left frontal hub connectivity delays cognitive impairment in autosomal-dominant and sporadic Alzheimer’s disease
Source: PubMed Central journal article supplement (PMC5888938; doi:10.1093/brain/awy008), 2018-02-15
Supplement: brain-2017-01352-file008_awy008.pdf [file brain-2017-01352-file008_awy008.pdf]

# 1) Main analysis: Linear mixed effects models

*Cognition ~ gLFC-connectivity x AD severity + Cov*

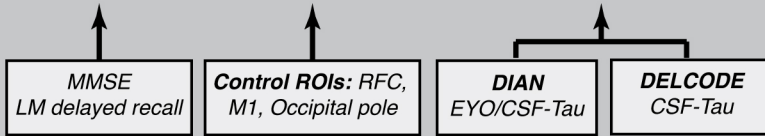

## 2) Comparison of model fit (Aikaike Information Criterion)

*Full model: Cognition ~ gLFC-connectivity x AD severity + Cov*  
*Reduced model: Cognition ~ gLFC-connectivity + AD severity + Cov*

## 3) Projection of cognitive & biomarker trajectories:

Fitting polynomial mixed models e.g.

standard:  $Cognition \sim (gLFC-connectivity)^1 \times AD\ severity + Cov$   
quadratic:  $Cognition \sim (gLFC-connectivity)^2 \times AD\ severity + Cov$   
cubic:  $Cognition \sim (gLFC-connectivity)^3 \times AD\ severity + Cov$

Model selection based on Aikaike Information Criterion

$$DIAN: \text{Standardized difference} = \frac{\text{Predicted value in MC} - \text{Predicted value in NC}}{\text{Standard deviation in MC \& NC}}$$
$$DELCODE: \text{Standardized difference} = \frac{\text{Predicted value in } A\beta^+ - \text{Predicted value in } A\beta^-}{\text{Standard deviation in } A\beta^+ \& A\beta^-}$$
